1 **Title:** Cutaneous *Leishmania mexicana* Infections in the United States: Defining Strains  
2 Through Endemic Human Pediatric Cases in Northern Texas

3

4 **Authors:** Binita Nepal, Ph.D.<sup>1,2</sup>; Clare McCormick-Baw, M.D., Ph.D.<sup>3</sup>; Karisma Patel,  
5 Pharm. D.<sup>1</sup>; Sarah Firmani, Pharm. D.<sup>1</sup>; Dawn M. Wetzel, M.D., Ph.D.<sup>1,2,\*</sup>

6

7 **Affiliations:** Departments of <sup>1</sup>Pediatrics, <sup>2</sup>Biochemistry, and <sup>3</sup>Pathology, University of  
8 Texas Southwestern Medical Center

9

10 **\*Corresponding author:** Dawn M. Wetzel, M.D., Ph.D., Department of Pediatrics and  
11 Biochemistry, University of Texas Southwestern Medical Center, 5323 Harry Hines  
12 Blvd, Dallas, TX 75390; phone 214-645-9510; fax 214-648-2961; email:

13 [dawn.wetzel@utsouthwestern.edu](mailto:dawn.wetzel@utsouthwestern.edu)

14

15 **Running title:** Endemic leishmaniasis in the United States

16

17 **Keywords:** cutaneous, *Leishmania mexicana*, leishmaniasis, pediatrics, parasitology,  
18 Texas

19

20 **Abbreviations:** 6 phosphogluconate dehydrogenase (6PGD), Centers for Disease  
21 Control and Prevention (CDC), Infectious Diseases (ID), Infectious Disease Society of  
22 America (IDSA), malate dehydrogenase (MDH), mannose phosphate isomerase (MPI),  
23 multi-locus sequence analysis (MLSA), polymerase chain reaction (PCR), University of  
24 Texas Southwestern Medical Center (UTSW), United States (US)

25

26 **Word counts:** Manuscript 1940/2000; Abstract 248/250; Importance 144/150

27 **ABSTRACT**

28 Over a six-month span, three patients under five years old with cutaneous leishmaniasis  
29 presented to the Pediatric Infectious Diseases Clinic at the University of Texas  
30 Southwestern Medical Center/Children's Health Dallas. None had traveled outside of  
31 the United States (US); all had confirmed *L. mexicana* infections by PCR. We provide  
32 case descriptions and images to increase the awareness of this disease among US  
33 physicians and scientists. Two patients responded to fluconazole, but one required  
34 topical paromomycin. Combining these cases with guidelines and our literature review,  
35 we suggest that: 1) higher doses (ten-twelve mg/kg/day) of fluconazole should be  
36 considered in young children to maximize likelihood and rapidity of response and 2)  
37 patients should transition to alternate agents if they do not respond to high-dose  
38 fluconazole within six weeks. Furthermore, and of particular interest to the broad  
39 microbiology community, we used samples from these cases as a proof-of-concept to  
40 propose a mechanism to strain-type US-endemic *L. mexicana*. For our analysis, we  
41 sequenced three housekeeping genes and the internal transcribed sequence 2 of the  
42 ribosomal RNA gene. We identified genetic changes that not only allow us to distinguish  
43 US-based *L. mexicana* strains from strains found in other areas of the Americas, but  
44 also establish polymorphisms that differ between US isolates. These techniques will  
45 allow documentation of genetic changes in this parasite as its range expands. Hence,  
46 our cases of cutaneous leishmaniasis provide significant evolutionary, treatment and  
47 public health implications as climate change increases exposure to formerly tropical  
48 diseases in previously non-endemic areas.

49

50 **IMPORTANCE**

51 Leishmaniasis is a parasitic disease that typically affects tropical regions worldwide.  
52 However, the vector that carries *Leishmania* is spreading northward into the United  
53 States (US). Within a six-month period, three young cutaneous leishmaniasis patients  
54 were seen at the Pediatric Infectious Diseases Clinic at The University of Texas  
55 Southwestern/Children's Health Dallas. None had traveled outside of north Texas. We  
56 document their presentations, treatments, and outcomes and compare their  
57 management to clinical practice guidelines for leishmaniasis. We also analyzed the  
58 sequences of three critical genes in *Leishmania mexicana* isolated from these patients.  
59 We found changes that not only distinguish US-based strains from strains found  
60 elsewhere, but also differ between US isolates. Monitoring these sequences will allow  
61 tracking of genetic changes in parasites over time. Our findings have significant US  
62 public health implications as people are increasingly likely to be exposed to what were  
63 once tropical diseases.

64

## 65 INTRODUCTION

66 Leishmaniasis is caused by obligate intracellular parasites of the genus  
67 *Leishmania*, which are spread by *Lutzomyia* and *Phlebotomus* sand flies. A spectrum of  
68 human illness results, including cutaneous, mucocutaneous, and visceral disease.  
69 Disease manifestations are governed by the infecting parasite species and host immune  
70 status (1).

71  
72 Generations of medical providers and infectious diseases specialists have been  
73 taught that leishmaniasis occurs in tropical and subtropical regions, and not the United  
74 States (US). Such viewpoints are reflected in published distributions of leishmaniasis  
75 (2). However, over time, the sand fly vector's distribution has expanded into previously  
76 non-endemic areas (3), and leishmaniasis is well-documented in US animals (4). In  
77 addition, multiple articles have described human acquisition of cutaneous leishmaniasis  
78 within Oklahoma and Texas, where leishmaniasis is now a reportable disease (5). In  
79 fact, a cross-sectional observational study indicated that 41/69 cases (59%) of  
80 cutaneous leishmaniasis diagnosed from 2007-2017 in Texas were acquired locally  
81 rather than from travel (6). Nevertheless, it is common for US providers to contemplate  
82 a leishmaniasis diagnosis in only patients with a history of foreign birth, travel, or military  
83 service, which in turn often excludes pediatric patients from consideration.

84  
85 Within a 6-month period, 3 patients with cutaneous leishmaniasis presented to  
86 the Pediatric Infectious Diseases (ID) Clinic at the University of Texas Southwestern  
87 Medical Center (UTSW)/Children's Health Dallas. These cases reflect this disease's

88 changing epidemiology, since clinical isolates from these patients had genetic  
89 polymorphisms that have been documented in Texan strains of *L. mexicana*.  
90 Furthermore, we sequenced three *Leishmania* housekeeping genes and identified  
91 significant differences between our clinical isolates, providing us with a novel  
92 mechanism to type *L. mexicana* strains. Monitoring these sequences could permit  
93 documentation of genetic variation among *Leishmania* isolates as this parasite expands  
94 its geographic range in the US.  
95

## 96 RESULTS

### 97 Patient presentations

98 3 cases of cutaneous leishmaniasis acquired in Texas were referred to the  
99 Pediatric ID Clinic at UTSW/Children's Health Dallas over a six month period by their  
100 treating dermatologists. Interestingly, none of these patients' family members had  
101 lesions. Descriptions of these cases follow (**Figure 1**).

#### 103 Case 1:

104 A 0-5 year old girl reported a non-healing nodular lesion on her right jawline that  
105 had been present for months. She had not traveled outside north Texas. The lesion had  
106 not responded to antibiotic therapy and worsened with steroids. A biopsy showed a  
107 granulomatous infiltrate within the dermis, with amastigotes observed inside histiocytes,  
108 diagnostic of cutaneous leishmaniasis. Genetic analysis performed at the Centers for  
109 Disease Control and Prevention (CDC) demonstrated *L. mexicana* infection. She was  
110 started on 6 mg/kg/day of fluconazole and, with 6 weeks of treatment, the lesion  
111 essentially resolved.

#### 113 Case 2:

114 A few months later, a 0-5 year-old boy who had no travel history developed a  
115 non-healing nodular lesion on his left arm. It did not respond to antibiotics and ulcerated  
116 after steroids were administered. He was seen in the ID clinic and had a nearly 2.5 cm-  
117 diameter ulcer (**Fig 1A**). Biopsy demonstrated granulomatous inflammation with  
118 innumerable amastigotes within histiocytes (**Fig 1B-D**). PCR amplification of parasite

119 DNA performed through the CDC detected *L. mexicana*. He received 6 mg/kg/day of  
120 fluconazole and required 10 weeks of therapy for lesion resolution.

121

### 122 **Case 3:**

123 A 0-5 year old boy developed a nodular facial lesion that did not improve with  
124 antibiotics and worsened with steroids. He had never traveled outside north  
125 Texas/southern Oklahoma; however, he had been taken for daily walks at sunset at a  
126 lake near his home. A biopsy and genetic sequencing performed at the CDC  
127 demonstrated *L. mexicana* infection, leading to ID referral approximately 1 month after  
128 patient 2. He was treated with fluconazole at 6 mg/kg/day, which was increased to 12  
129 mg/kg/day after minimal clinical response. When his lesion failed to improve on  
130 fluconazole, he was given topical paromomycin, compounded as in **Figure 1E** (7). After  
131 several months, his lesion resolved.

132

### 133 **Genetic sequencing of patient isolates**

134 Since there appeared to be an elevated incidence of local *Leishmania* infections,  
135 we explored whether there was genetic variability in parasites from clinical samples.  
136 With permission from patients 2 and 3, we obtained DNA from lesions for molecular  
137 testing (termed Tx2 and Tx3, **Figure 2** and **Supplemental Material**). Unfortunately, a  
138 sample from the initial patient (patient 1) was not available for further study. We then  
139 proceeded with molecular testing as follows.

140

### 141 **ITS2 sequencing:**

142 The CDC sequences the ribosomal RNA-internal transcribed spacer 2 (ITS2)  
143 region to identify the infecting *Leishmania* species, since having this information is  
144 needed for appropriate therapeutic decisions (7). Texas-specific ITS2 polymorphisms in  
145 *L. mexicana* have been described, specifically A → C647 and T → C649 (8). Our  
146 sequence analysis confirmed that these ITS2 polymorphisms were seen in both of our  
147 isolates (**Supplemental Figure and Table**).

148

#### 149 ***Multilocus Sequence Analysis (MLSA):***

150 We next explored whether there was intraspecies variation among isolates using  
151 multilocus sequence analysis (MLSA). We selected a panel of 3 housekeeping genes:  
152 mannose phosphate isomerase (MPI), malate dehydrogenase (MDH) and 6  
153 phosphogluconate dehydrogenase (6PGD). We used gene-specific primers for  
154 amplification and Sanger sequencing to identify synonymous/nonsynonymous SNPs in  
155 coding regions. Of note, our primers did not amplify genetic material from uninfected  
156 human samples.

157

158 We found that 6PGD was the most conserved gene, with the least number of  
159 SNPs in both isolates. Interestingly, the MDH and MPI genes of Tx2 had significantly  
160 diverged from reference strains. In fact, the MDH enzyme in Tx2 was prematurely  
161 truncated (by 9 aa at the C terminus) due to transversion 922 (A→T) (**Figure 2,**  
162 **Supplemental Table**). Tx3 also had several SNPs in the MDH and MPI genes that did  
163 not match reference strains (**Figure 2, Supplemental Table**). Hence, MLSA analysis of



164 these three metabolic genes may provide a unique molecular epidemiological

165 mechanism to study genetic divergence in *L. mexicana*.

166

167 **DISCUSSION**

168           Here, we have documented 3 cases of cutaneous leishmaniasis due to *L.*  
169 *mexicana* acquired by pediatric patients within northern Texas. Since our described  
170 patients had normal immune systems and did not have infected family members, we  
171 believe they were individually exposed to sandflies outside their homes. Despite their  
172 relatively small number, our cases have significant bearing on US public health  
173 initiatives, as the likelihood of US patient exposure to what were formerly  
174 geographically-constrained tropical diseases will likely continue to increase as shifting  
175 vector distribution and other drivers continue (3). In addition, we have provided a simple  
176 means to type strains of *L. mexicana* endemic to the United States. We propose that  
177 our methodology can be used to monitor genetic changes in *Leishmania* as the range of  
178 this parasite expands.

179

180           Our cases provide multiple therapeutic imputations for treating physicians in the  
181 US. Per Infectious Disease Society of America (IDSA) guidelines, treating single lesions  
182 from non-disseminating cutaneous species is optional, even in pediatric patients (7).  
183 However, we treated our patients for cosmetic reasons, since each had facial or large  
184 lesions. The referring dermatologists were hesitant to utilize local cryotherapy or  
185 brachytherapy (standard for single *L. mexicana*-induced lesions) due to patient age.  
186 IDSA guidelines indicate that employing fluconazole is reasonable for US pediatric  
187 cutaneous leishmaniasis patients (7). Therefore, our patients were initially treated with  
188 oral fluconazole, which has a ~50% success rate among all species (9, 10); 2 of our  
189 patients responded. Fluconazole is generally well-tolerated, has good oral  
190 bioavailability, and achieves epidermis/dermis concentrations above plasma levels (11,

191 12). A dose of 6 mg/kg typically is recommended for pediatric cutaneous leishmaniasis  
192 (7). However, for serious fungal infections, many authors propose higher doses (12  
193 mg/kg) in children based on fluconazole's lower half-life, higher volume of distribution,  
194 more rapid clearance, and minimal side effect profile in pediatric patients, to prevent  
195 treatment failure or relapse (13), (14). Combining this literature with our experience,  
196 initiating higher doses (10-12 mg/kg/day (15)) in younger ( $\leq$  5-year-old) pediatric  
197 leishmaniasis patients may be worthwhile to maximize likelihood and rapidity of  
198 response. Furthermore, we note our third patient did not respond to months of  
199 fluconazole therapy. Consistent with IDSA guidelines, we propose that pediatric  
200 leishmaniasis patients be transitioned to alternate agents if they do not begin to respond  
201 to high-dose fluconazole in 4-6 weeks (7). Notably, the topical paromomycin employed  
202 in patient 3 can be difficult to acquire in the US, as it requires compounding by a willing  
203 pharmacy and investigational drug applications, so we did not use it initially in our  
204 patients.

205  
206 We also determined that our patients' *Leishmania* isolates have undergone  
207 significant genetic changes that may offer insights into evolutionary biology. Notably, it  
208 is now more common for patients in Texas to acquire leishmaniasis locally than from  
209 travel (5, 6). The CDC has described a specific polymorphism in the ITS2 sequence of  
210 *L. mexicana* in Texas-endemic strains; we replicated these results in our patients'  
211 isolates. Furthermore, we provide a mechanism for strain-typing isolates of this newly-  
212 endemic parasite using 3 metabolic genes. Our results demonstrate the power of MLSA  
213 analysis as a simple yet important molecular epidemiological tool to study *Leishmania*

214 genetic divergence within the US. Since clusters of leishmaniasis cases have been  
215 described, our technique could potentially be used to characterize outbreaks. The large  
216 number of genetic changes that we found using a limited number of isolates suggests  
217 that Texas-specific strains of *L. mexicana* may be under significant evolutionary  
218 selection pressure, which in turn may lead to novel mutations. We plan to continue to  
219 monitor available isolates for this possibility over time.

220

221         Although cases of leishmaniasis certainly have been described in the United  
222 States, our case discussions have typically been met with surprise from clinicians and  
223 scientists alike. One factor that may lead to this underappreciation of endemicity is that  
224 leishmaniasis is a reportable disease in Texas, but not in other states (6). We would  
225 argue that leishmaniasis should be a reportable disease nationwide so that its incidence  
226 and distribution can be monitored by public health officials. Furthermore, we propose  
227 that such information could be collected in conjunction with our strain-typing techniques  
228 to characterize ongoing genetic variation in this parasite as its endemic area expands.  
229 Hence, the cases of cutaneous leishmaniasis described here have significant  
230 microbiological, treatment and public health implications.

231

## 232 **METHODS**

### 233 ***Molecular analysis/Strain typing:***

234 For patient 2 in this report, a clinical sample (termed Tx2) was obtained and briefly  
235 cultured at UTSW as promastigotes in Schneider's Insect cell media (Sigma, S9895)  
236 supplemented with 20% FBS (GeminiBio, 100-106) and 1% penicillin-streptomycin  
237 (Sigma, P4333). Time in culture was limited to minimize genetic changes *in vitro*. DNA  
238 was extracted using the DNAeasy Blood and tissue Kit (Qiagen, 69504) according to  
239 manufacturer's instructions. For patient 3 (Tx3), we received extracted DNA from the  
240 CDC (Thanks to Yvonne Qvarnstrom, CDC), which had been generated in a similar  
241 manner to Tx2. Extracted DNA was used to amplify the rRNA-internal transcribed  
242 spacer (ITS2) region for species identification (**Supplemental Figure**) and three  
243 housekeeping genes: mannose phosphate isomerase (MPI), malate dehydrogenase  
244 (MDH) and 6 phosphogluconate dehydrogenase (6PGD) with gene specific primers for  
245 *L. mexicana*. Sequences for all primers are in the **Supplemental Table**. The CDS  
246 region for these genes was then used for MLSA to explore genetic variation among  
247 isolates. Briefly, each gene was amplified with high fidelity DNA polymerase Primestart  
248 Max (Takara Bio, RO45A) using forward and reverse primers binding in upstream and  
249 downstream coding regions, respectively. PCR amplified fragments were Sanger  
250 sequenced in the UTSW McDermott Center Sequencing Core facility using Life  
251 Technologies® Dye Terminator 3.1 chemistry and 3730XL Genetic Analyzers.

252

### 253 ***Single nucleotide polymorphism (SNP) analysis:***

254 Each gene was sequenced bidirectionally using 2 sets of forward (ExtF, IntF) and  
255 reverse (ExtR and IntR) primers. ExtF and ExtR bind outside of the coding region and  
256 IntF and IntR bind in the coding region. Due to the sequence variability found in the Tx2  
257 MPI gene, multiple internal primers were used. SNP analysis was performed using the  
258 sequence alignment tools EMBOSS needle and Clustal Omega ([www.ebi.ac.uk](http://www.ebi.ac.uk)).

259

260

261 **REFERENCES**

- 262 1. Wetzel DM, Phillips MA. Chapter 67: Chemotherapy of protozoal infections:  
263 amebiasis, giardiasis, trichomoniasis, trypanosomiasis, leishmaniasis, and other  
264 protozoal infections. In: Brunton L, editor. Goodman and Gilman's The Pharmacological  
265 Basis of Therapeutics. 13 ed. New York, NY: McGraw-Hill Medical; 2023. p. 1309-24.
- 266 2. <https://www.cdc.gov/dpdx/leishmaniasis/index.html>.
- 267 3. Gonzalez C, Wang O, Strutz SE, Gonzalez-Salazar C, Sanchez-Cordero V,  
268 Sarkar S. Climate change and risk of leishmaniasis in North America: predictions from  
269 ecological niche models of vector and reservoir species. PLoS Negl Trop Dis. 2010 Jan  
270 19;4(1):e585.
- 271 4. Petersen CA. Leishmaniasis, an emerging disease found in companion animals  
272 in the United States. Top Companion Anim Med. 2009 Nov;24(4):182-8.
- 273 5. Wright NA, Davis LE, Aftergut KS, Parrish CA, Cockerell CJ. Cutaneous  
274 leishmaniasis in Texas: A northern spread of endemic areas. J Am Acad Dermatol.  
275 2008 Apr;58(4):650-2.
- 276 6. McIlwee BE, Weis SE, Hosler GA. Incidence of endemic human cutaneous  
277 leishmaniasis in the United States. JAMA Dermatol. 2018 Sep 1;154(9):1032-9.
- 278 7. Aronson N, Herwaldt BL, Libman M, Pearson R, Lopez-Velez R, Weina P, et al.  
279 Diagnosis and treatment of leishmaniasis: clinical practice guidelines by the Infectious  
280 Diseases Society of America (IDSA) and the American Society of Tropical Medicine and  
281 Hygiene (ASTMH). Am J Trop Med Hyg. 2016 Dec 07.
- 282 8. de Almeida ME, Steurer FJ, Koru O, Herwaldt BL, Pieniazek NJ, da Silva AJ.  
283 Identification of Leishmania spp. by molecular amplification and DNA sequencing

- 284 analysis of a fragment of rRNA internal transcribed spacer 2. J Clin Microbiol. 2011  
285 Sep;49(9):3143-9.
- 286 9. Prates FV, Dourado ME, Silva SC, Schriefer A, Guimaraes LH, Brito MD, et al.  
287 Fluconazole in the treatment of cutaneous leishmaniasis caused by *Leishmania*  
288 *braziliensis*: a randomized controlled trial. Clin Infect Dis. 2017 Jan 1;64(1):67-71.
- 289 10. Alrajhi AA, Ibrahim EA, De Vol EB, Khairat M, Faris RM, Maguire JH.  
290 Fluconazole for the treatment of cutaneous leishmaniasis caused by *Leishmania major*.  
291 N Engl J Med. 2002 Mar 21;346(12):891-5.
- 292 11. Faergemann J. Pharmacokinetics of fluconazole in skin and nails. J Am Acad  
293 Dermatol. 1999 Jun;40(6 Pt 2):S14-20.
- 294 12. Faergemann J, Laufen H. Levels of fluconazole in serum, stratum corneum,  
295 epidermis-dermis (without stratum corneum) and eccrine sweat. Clin Exp Dermatol.  
296 1993 Mar;18(2):102-6.
- 297 13. Pacifici GM. Clinical pharmacology of fluconazole in infants and children. Clin  
298 Med Investig. 2020;5:10.15761.
- 299 14. Watt K, Benjamin DK, Jr., Cohen-Wolkowicz M. Pharmacokinetics of antifungal  
300 agents in children. Early Hum Dev. 2011 Mar;87 Suppl 1(Suppl 1):S61-5.
- 301 15. Wade KC, Benjamin DK, Jr., Kaufman DA, Ward RM, Smith PB, Jayaraman B, et  
302 al. Fluconazole dosing for the prevention or treatment of invasive candidiasis in young  
303 infants. Pediatr Infect Dis J. 2009 Aug;28(8):717-23.

304

305



306 **ACKNOWLEDGEMENTS**

307           We are grateful to staff members in the UTSW/Children’s Health Dallas Pediatric  
308 Infectious Diseases clinic for their flexibility in patient scheduling to ensure that these  
309 leishmaniasis patients saw Dr. Wetzel. We thank the Texas Department of Health for  
310 discussing these cases with us when we reported them, members of the UT  
311 Southwestern and global parasitology communities for their support and interest in this  
312 experience, and the Pediatric ID Division at UT Southwestern for providing helpful  
313 advice. We also thank Dr. Yvonne Qvarnstrom at the CDC for assisting us with  
314 acquiring leishmanial DNA from patient 3. Dr. Nepal is funded by American Heart  
315 Association Postdoctoral Fellowship 916875. Dr. Wetzel was supported by a Children’s  
316 Clinical Research Advisory Committee (CCRAC) Early Investigator Award, a 2019  
317 Harrington Scholar-Innovator Award, NIH R01 AI146349, a Welch Grant for Chemistry  
318 (I-2086) and funds from the UTSW Department of Pediatrics. The funders did not play a  
319 role in the writing of this manuscript. Reporting of this small case series ( $\leq 3$  patients)  
320 was exempt from UTSW/Children’s Health Dallas-IRB approval. However, the patients  
321 in this study provided permission for images to be used and for clinical samples to be  
322 taken; these activities were approved by the IRBs at both UTSW and Children’s Health  
323 (STU-2019-0754).

324

325

326 **FIGURES**

327 **Figure 1**

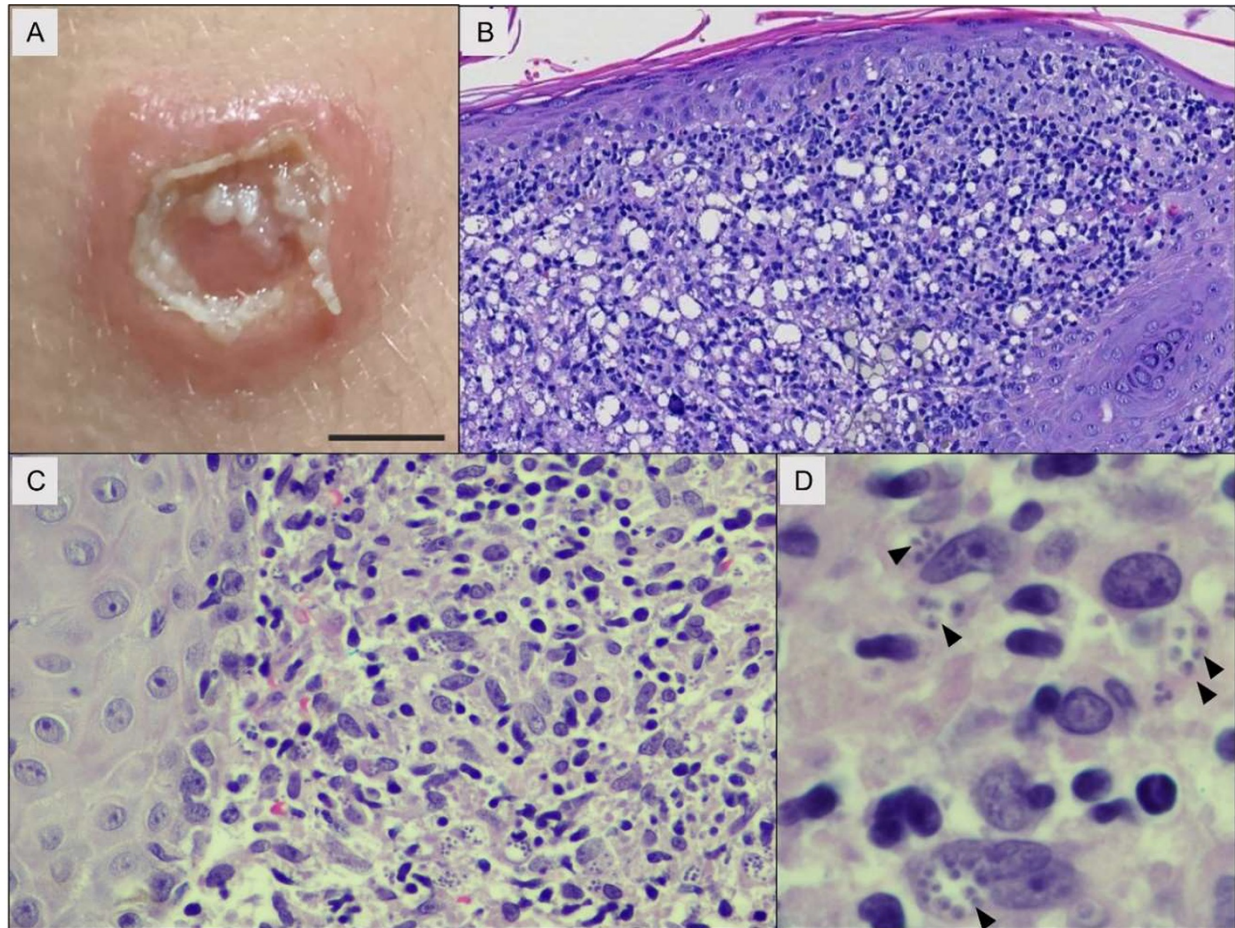

| E | Clinical features                            | Case 1                        | Case 2                                       | Case 3                                                                                                                                                                       |
|---|----------------------------------------------|-------------------------------|----------------------------------------------|------------------------------------------------------------------------------------------------------------------------------------------------------------------------------|
|   | <b>Gender</b>                                | Female                        | Male                                         | Male                                                                                                                                                                         |
|   | <b>Race/ethnicity</b>                        | Hispanic                      | Hispanic                                     | Caucasian                                                                                                                                                                    |
|   | <b>Travel history</b>                        | None                          | None                                         | None                                                                                                                                                                         |
|   | <b>Lesion location</b>                       | R inferior jaw                | L arm                                        | R temple                                                                                                                                                                     |
|   | <b>Lesion size/diameter</b>                  | 1.5 X 1.5 cm                  | 2.5 X 2.5 cm                                 | 1 X 2 cm                                                                                                                                                                     |
|   | <b>Duration of symptoms before diagnosis</b> | 6 months                      | 5 months                                     | 4 months                                                                                                                                                                     |
|   | <b>Infective species</b>                     | <i>L. mexicana</i>            | <i>L. mexicana</i>                           | <i>L. mexicana</i>                                                                                                                                                           |
|   | <b>Initial lab abnormalities*</b>            | None performed                | Eosinophilia (AEC 740)<br>Elevated IgE (215) | Mild neutropenia (ANC 1300)<br>Eosinophilia (AEC 1300)<br>Mildly low IgG (241)                                                                                               |
|   | <b>Treatment</b>                             | Fluconazole (6 mg/kg) X 6 wks | Fluconazole (6 mg/kg) X 10 wks               | Fluconazole (6 mg/kg X 5 wks; 8 mg/kg X 3 weeks; 12 mg/kg X 6 wks) →<br>Topical paromomycin (15% paromomycin, 12% MBCL in paraffin) X 10 days on, 10 days off X 3 iterations |

329 **Figure 1: Clinical features of patients presented. A-D)** Clinical and histopathological  
330 evaluation of patient 2. **A)** Approximately 2.5 cm lesion on the left arm clinically  
331 consistent with cutaneous leishmaniasis. Scale bar = 1 cm. **B)** Granulomatous  
332 inflammation with numerous histiocytes (100x magnification, H&E). Sample shared from  
333 Sagis Diagnostics, Houston, TX. **C)** Small, round amastigotes are visible within  
334 histiocytes in the reticular dermis (500x magnification, H&E). **D)** Amastigotes within  
335 histiocytes with visible kinetoplasts at arrowheads (1000x magnification, oil immersion,  
336 H&E). **E)** Patient demographics, signs and symptoms, and laboratory findings. \*Normal  
337 studies in Case 2 included CBC, remainder of differential, C-reactive protein, and  
338 chemistries including liver function panel. Normal studies in Case 3 included CBC,  
339 remainder of differential, C-reactive protein, chemistries including liver function panel,  
340 IgA, IgM, and IgE. All laboratory abnormalities resolved after treatment. ANC, Absolute  
341 neutrophil count. AEC, Absolute eosinophil count.

342

343 **Figure 2**

344 **A**

| Substitution        | MPI                                                                                                                                                                                                 |                                     | MDH                                                                                                                                                                             |           | PGD       |           |
|---------------------|-----------------------------------------------------------------------------------------------------------------------------------------------------------------------------------------------------|-------------------------------------|---------------------------------------------------------------------------------------------------------------------------------------------------------------------------------|-----------|-----------|-----------|
|                     | Tx2                                                                                                                                                                                                 | Tx3                                 | Tx2                                                                                                                                                                             | Tx3       | Tx2       | Tx3       |
| <b>Transitions</b>  | 252 (G→A)<br>417 (C→T)<br>501 (A→G)<br>504 (C→T)<br><b>529 (A→G)</b><br><b>592 (A→G)</b><br>612 (T→C)<br><b>661 (T→C)</b><br>693 (A→G)<br>711 (T→C)<br>720 (G→A)<br><b>1148 (A→G)</b><br>1182 (G→A) | 592 (A→G)<br>612 (T→C)<br>661 (T→C) | <b>185 (T→C)</b><br><b>223 (A→G)</b><br><b>226 (C→T)</b><br>300 (T→C)<br>332 (T→C)<br><b>515 (A→G)</b><br><b>523 (A→G)</b><br>846 (C→T)<br><b>868 (A→G)</b><br><b>869 (T→C)</b> | 523 (A→G) | 990 (A→G) | 990 (A→G) |
| <b>Transversion</b> | 483 (A→T)<br>493 (A→T)<br><b>545 (C→G)</b><br><b>605 (C→A)</b><br><b>663 (C→G)</b><br>870 (C→A)<br>1032 (C→G)                                                                                       |                                     | <b>184 (T→A)</b><br>292 (A→C)<br>378 (T→G)<br>922 (A→T)<br>946 (T→A)                                                                                                            | 292 (A→C) | 729 (G→T) |           |

345

346 **B**

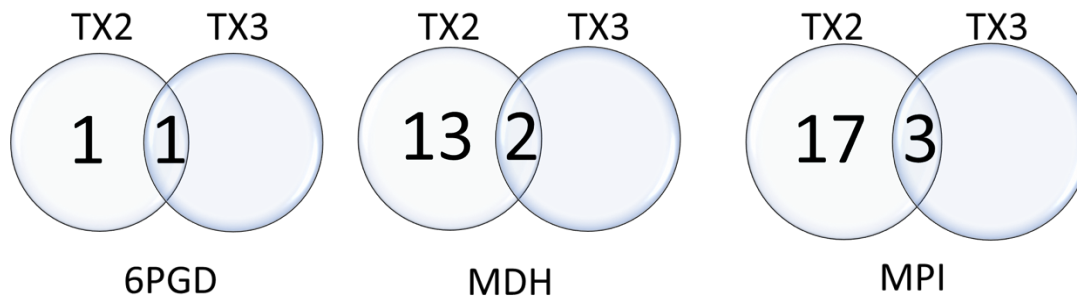

347

348 **Figure 2. Genetic analysis of clinical isolates. A)** SNPs reported after MLSA

349 analysis. The nonsynonymous SNPs are in bold. **B)** Venn diagram showing SNPs

350 reported on genes analyzed by MLSA.

351

352 **SUPPLEMENTAL MATERIAL**

353

354 **Supplemental Methods, Results and Discussion:**

355 Additional specific details regarding genetic sequencing of the clinical isolates from  
356 these patients are described below. Of interest, this analysis can be done after sampling  
357 lesions with a flocked nylon swab, which provides a less invasive means of diagnosis in  
358 children. All sequences described in this manuscript have been submitted to TriTryp DB  
359 ([TriTrypDB](#)).

360

361 **ITS2:** We performed sequence analysis on the rRNA-internal transcribed spacer 2  
362 (ITS2) region, which shows a previously reported Texas-specific polymorphism, C647  
363 and C649, on both Tx2 and Tx3. For this analysis, FJ948434 was used as a reference  
364 strain. However, alignments of the FJ948434 ITS2 sequence with 25 publicly available  
365 non-US *L. mexicana* ITS2 sequences were identical. Isolates' ITS2 sequences are  
366 shown in the **Supplemental Figure**, and primer sequences are contained in the  
367 **Supplemental Table**.

368

369 **Metabolic enzymes:** For the three metabolic enzymes sequenced, *Leishmania*  
370 *mexicana* MHOM/GT/2001/U1103 (Guatemala) was used as a reference strain, since it  
371 is the *L. mexicana* strain with the most widely available genomic sequence (1).

372

373 **MDH:** SNP analysis in the CDS of the MDH gene showed a total of 15 SNPs in Tx2. We  
374 identified nine base transitions: 185 (T→C), 223 (A→G), 226 (C→T), 300 (T→C), 332  
375 (T→C), 515 (A→G), 523 (A→G), 846 (C→T), 868 (A→G), 869 (T→C), and five base

376 transversions, 184 (T→A), 292 (A→C), 378 (T→G), 922 (A→T), 946 (T→A). Tx3 had  
377 two SNPs, a base transition at 523 (A→G) and a transversion at 292 (A→C). We note  
378 that SNPs 184 (T→A), 185 (T→C), 223 (A→G), 226 (C→T), 515 (A→G), 523 (A→G),  
379 868 (A→G), 869 (T→C) were nonsynonymous and resulted in amino acid changes  
380 (**Figure 2, Supplemental Table**). Of particular interest, MDH in Tx2 was prematurely  
381 truncated (by 9 aa at the C terminus) due to transversion 922 (A→T). However, this  
382 truncation would not be expected to affect its enzymatic function (2).

383

384 *PGD*: Similarly, we identified 2 SNPs on coding region of PGD gene of Tx2,  
385 transversion at 729 (G→T) and single transition 990 (A→G). Tx3 had a single base  
386 transition at 990 (A→G).

387

388 *MPI*: The MPI gene for the Tx3 isolate had 3 base transitions, 592 (A→G), 612 (T→C),  
389 661 (T→C). On the other hand, for Tx2, the MPI gene had 20 SNPs: transitions 252  
390 (G→A), 417 (C→T), 501 (A→G), 504 (C→T), 529 (A→G), 592 (A→G), 612 (T→C), 661  
391 (T→C), 693 (A→G), 711 (T→C), 720 (G→A), 1148 (A→G), 1182 (G→A) and  
392 transversions: 483 (A→T), 493 (A→T), 545 (C→G), 605 (C→A), 663 (C→G), 870  
393 (C→A), 1032 (C→G). SNPs 529 (A→G), 545 (C→G), 592 (A→G), 605 (C→A), 661  
394 (T→C), 663 (C→G), 1148 (A→G) were nonsynonymous.

395

396

397 **Supplemental Figure**

398

|     |              |                                                             |     |
|-----|--------------|-------------------------------------------------------------|-----|
| 399 | FJ948434 . 1 | ATACACACATGTGCACTCTCCTTTGTGTGGGTGCGCGCGTGAAAAACTCCTCTCTGGTG | 660 |
| 400 | Tx2 . ITS2   | ATACACACATGTGCACTCTCCTTTGTGTGGGTGCGCGCGTGAAAAACCCCTCTCTGGTG | 224 |
| 401 | Tx3 . IT2    | ATACACACATGTGCACTCTCCTTTGTGTGGGTGCGCGVGTGAAAAACCCCTCTCTGGTG | 224 |
| 402 |              | ***** * *****                                               |     |

403

404 **Supplemental Figure.** Sequences of the relevant ITS2 region in a representative non-

405 US reference strain (FJ948434.1), compared to Tx2 and Tx3.

406

407

408 **Supplemental Table**  
409

| Gene                                               | Accession number | Amplicon size (bp) | CDS length (bp) | Location     | Primer sequence                                                                                                                                                                                                                                             |
|----------------------------------------------------|------------------|--------------------|-----------------|--------------|-------------------------------------------------------------------------------------------------------------------------------------------------------------------------------------------------------------------------------------------------------------|
| ITS2                                               |                  | Variable           | N/A             | 18S ribosome | ITS2.F: GCATGCCATATTCTCAGTGTC<br>ITS2.R: GGCCAACGCGAAGTTGAATTC<br>ITS2.R1: GAATTCTCGTTTTGGTTTTTTG                                                                                                                                                           |
| Glucose-6-phosphate dehydrogenase ( <i>g6pdh</i> ) | XM_003879281.1   | 1700               | 1440            | Chr 34       | ExtF: TTA CTGGCGCTTAGTCCCATCATA<br>ExtR: TAAGAGCGGAATCGGGTGC<br>IntF: GCAGGCAACTATCTGTCAGAGAA<br>IntR: ATGTTGAGCGAGGGCGCTG                                                                                                                                  |
| Malate dehydrogenase ( <i>mdh</i> )                | XM_003878549.1   | 1166               | 951             | Chr 33       | ExtF: TGCCGTACAATCCATCTCGC<br>ExtR: AACGACGCCGCATCATTGTG<br>IntF: ATCATCAGCAACCCTGTCAACAGC<br>IntR: TAACGTCGTACGGGCTTGC                                                                                                                                     |
| Mannose phosphate isomerase ( <i>mpi</i> )         | XM_003879281     | 1471               | 1266            | Chr 31       | ExtF: TCTGGGTTGTGTAGTAGCGTC<br>ExtR: AATTCGCCTGCCACTGTG<br>IntF: TCCAGAGCTGGCTGAGCTTGTAG<br>IntR: CATAACGGTTCGTCATCATAGTC<br>SeqF1: CTTTGAGGCACTCTGCTGC<br>SeqF2: GACTATGATGACGACCGTGTATG<br>SeqR: GTCGTATCGTTCACCTTGGCAG<br>SeqR1: CGTCAATGTTGAAGGAACTCGGT |

410

411 **Supplemental Table. Genes and primer sequences used for MLSA analysis.**

412

413



414 **SUPPLEMENTAL REFERENCES**

- 415 1. Rogers MB, Hilley JD, Dickens NJ, Wilkes J, Bates PA, Depledge DP, et al.  
416 Chromosome and gene copy number variation allow major structural change  
417 between species and strains of *Leishmania*. *Genome Res.* 2011  
418 Dec;21(12):2129-42.
- 419 2. Leroux A, Fleming-Canepa X, Aranda A, Maugeri D, Cazzulo JJ, Sánchez MA,  
420 and Nowicki C. Functional characterization and subcellular localization of the  
421 three malate dehydrogenase isozymes in *Leishmania* spp. *Mol Biochem*  
422 *Parasitol.* 2006: 149(1):74-85.
